# Supplementary material for: Identifying Regulators for EAG1 Channels with a Novel Electrophysiology and Tryptophan Fluorescence Based Screen
Source: PubMed Central journal article supplement (PMC2932742; doi:10.1371/journal.pone.0012523), 2010-09-02

**A**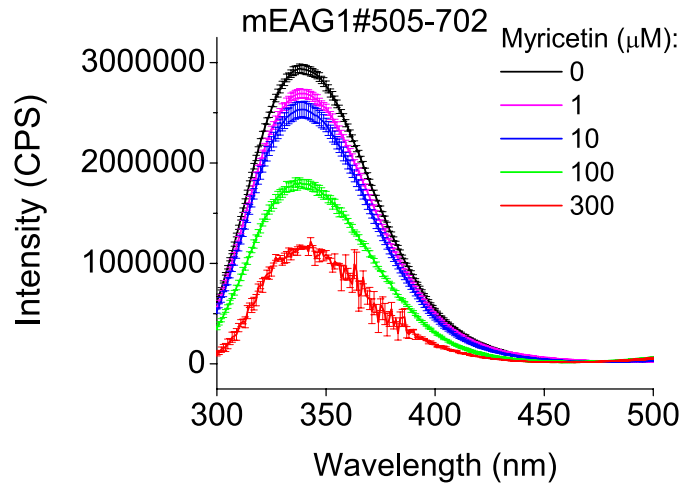**B**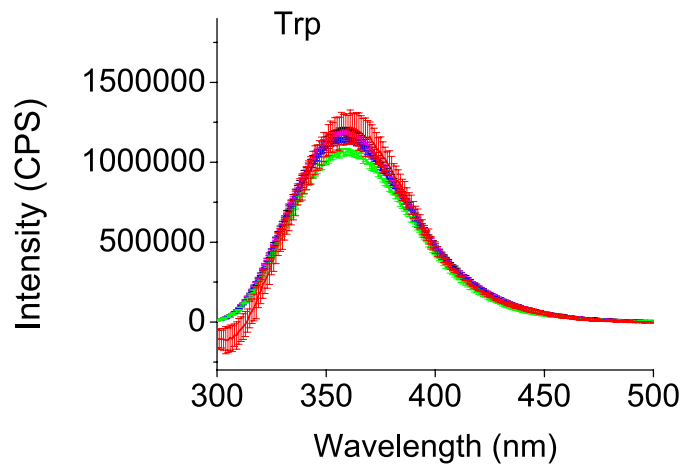**C**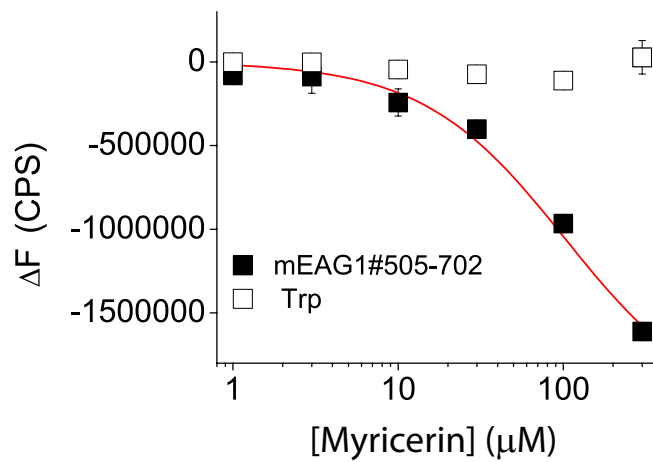

Supplement: pone.0012523.s003.pdf [file pone.0012523.s003.pdf]
